# Supplementary material for: A novel one-step quick assay for detection of SARS-COV2 antibodies across mammalian species
Source: PeerJ journal article supplement (doi:10.7717/peerj.11381), 2021-04-27
Supplement: Fig_S4.pdf [file Fig_S4.pdf]

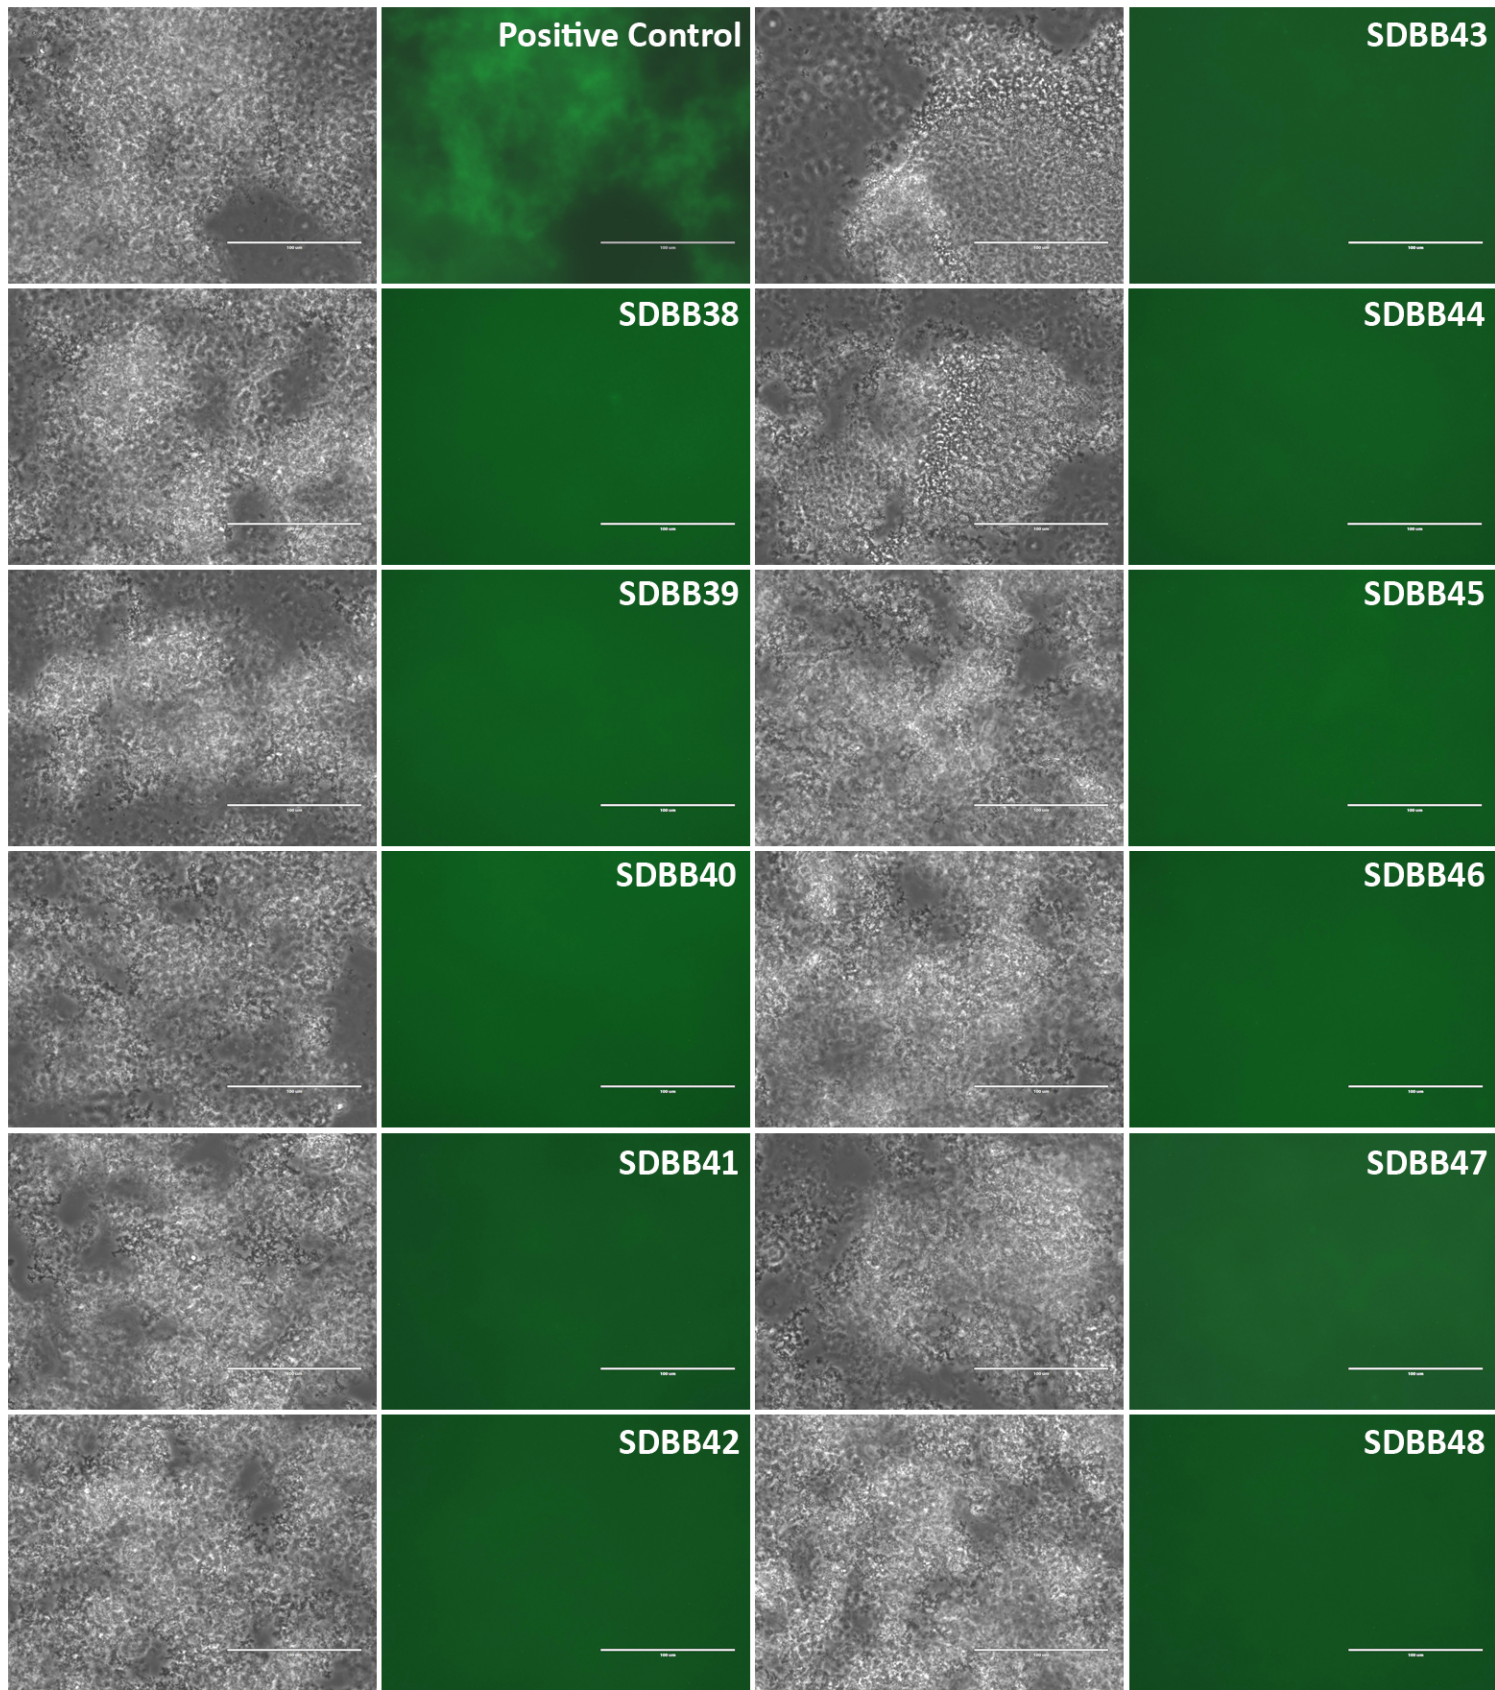

**Fig. S4**
