# Supplementary material for: A novel one-step quick assay for detection of SARS-COV2 antibodies across mammalian species
Source: PeerJ. 2021 Apr 27;9:e11381. doi: 10.7717/peerj.11381 (PMC8086566; doi:10.7717/peerj.11381)
Supplement: Supplemental Information 2 [file peerj-09-11381-s002.xlsx]

## Sheet: Sheet1
sample ID	Sex	Age range	COVID-19 test type	COVID-19 test result	Blood draw delayed days	IGG SRBD	IGM SRBD	CG-COV-IgG Test Line	CG-COV-IgM Test Line	Combined CG-COV-Ig Test Line	One-Step All Ig Test
A1	F	65-70	PCR	Negative	34	+	+	+	++	+	+					IGG SRBD: IgG antibody to the spike receptor binding domain (using indirect ELISA)
A2	F	75-80	PCR	Positive	34	+	+	+	+	+	+					IGM SRBD: IgM antibody to the spike receptor binding domain (using indirect ELISA)
A3	M	65-70	PCR	Positive	34	+	+	+	+	+	+					CG-COV-IgG Test Line: presence (+) or absence (-) of detectable IgG antibodies to the nucleocapsid protein (using lateral flow technology). Stronger band intensities are represented with more “+”
A4	M	65-70	PCR	Positive	33	+	+	++	-	+	+					CG-COV-IgM Test Line: presence (+) or absence (-) of detectable IgM antibodies to the nucleocapsid protein (using lateral flow technology). Stronger band intensities are represented with more “+”
A5	F	70-75	PCR	Positive	33	+	+	++	+	+	+					Serum & plasma columns: Number listed indicates the number of aliquots of that size that we have in stock
A6	F	90-95	PCR	Positive	33	+	+	+	-	+	+
A7	M	85-90	PCR	Positive	34	+	+	+	+	+	+
A8	F	75-80	PCR	Negative	34	+	+	+	-	+	+
A9	M	40-45	PCR	Positive	34	+	+	+	+	+	+
A10	M	70-75	PCR	Positive	33	+	+	+	++	+	+
A11	M	20-25	PCR	Positive	64	+	+	+	+	+	+
A12	M	55-60	PCR	Positive	33	+	+	+	+	+	+
A13	F	70-75	PCR	Positive	33	+	+	+	+	+	+
A14	F	60-65	PCR	Positive	33	+	+	+	+	+	+
A15	F	55-60	PCR	Positive	35	+	+	+	+	+	+
A16	M	60-65	PCR	Positive	34	+	+	+	+	+	+
A17	F	65-70	PCR	Positive	33	+	+	+	-	+	+
A18	M	40-45	antigen	Positive	25	+	+	+	+	+	+
A19	F	65-70	PCR	Positive	33	+	+	+	+	+	+
A20	F	50-55	PCR	Positive	33	+	+	+	-	+	+
A3	M	65-70	PCR	Positive	34	+	+	+	+	+	+
A4	M	65-70	PCR	Positive	33	+	+	++	-	+	+
A5	F	70-75	PCR	Positive	33	+	+	++	+	+	+
A6	F	90-95	PCR	Positive	33	+	+	+	-	+	+
A7	M	85-90	PCR	Positive	34	+	+	+	+	+	+
A8	F	75-80	PCR	Negative	34	+	+	+	-	+	+
A9	M	40-45	PCR	Positive	34	+	+	+	+	+	+
B1	F	75-80	PCR	Positive	33	+	+	-	-	-	+
B2	F	75-80	PCR	Positive	34	+	+	-	-	-	+
B3	F	65-70	PCR	Positive	34	+	+	-	-	-	+
B4	M	65-70	PCR	Negative	33	+	+	-	-	-	+
B5	M	60-65	PCR	Negative	33	+	+	-	-	-	+
B6	M	50-55	PCR	Positive	34	+	+	-	-	-	+
B7	F	15-20	PCR	Positive	18	+	+	-	-	-	+
B8	F	55-60	PCR	Positive	34	+	+	-	-	-	+
B9	M	80-85	PCR	Positive	33	+	+	-	-	-	+
B10	M	85-90	PCR	Positive	33	+	+	-	-	-	+
B11	M	85-90	PCR	Positive	33	+	+	-	-	-	+
B12	M	60-65	PCR	Positive	33	+	+	-	-	-	+
B13	F	75-80	PCR	Positive	33	+	+	-	-	-	+
B14	M	70-75	PCR	Negative	33	+	+	-	-	-	-
B15	M	75-80	PCR	Positive	33	+	+	-	-	-	+
B16	M	40-45	PCR	Positive	33	+	+	-	-	-	+
B17	M	50-55	PCR	Positive	34	+	+	-	-	-	+
B18	M	40-45	PCR	Positive	33	+	+	-	-	-	+
B19	M	55-60	PCR	Positive	34	+	+	-	-	-	+
B20	M	70-75	PCR	Positive	33	+	+	-	-	-	+
