# Supplementary material for: A novel one-step quick assay for detection of SARS-COV2 antibodies across mammalian species
Source: PeerJ. 2021 Apr 27;9:e11381. doi: 10.7717/peerj.11381 (PMC8086566; doi:10.7717/peerj.11381)
Supplement: Supplemental Information 3 [file peerj-09-11381-s003.xlsx]

## Sheet: Sheet1
Sample ID	Gender (M/F)	Age (in years)	Race		San Diego Blood Bank (July, 2019)
SDBB1	M	27	N/A
SDBB2	F	24	N/A
SDBB3	M	28	W
SDBB4	M	61	W
SDBB5	M	28	W
SDBB6	F	34	W
SDBB7	F	52	W
SDBB8	M	57	W
SDBB9	F	50	W
SDBB10	M	18	N/A
SDBB11	M	21	N/A
SDBB12	M	52	W
SDBB13	M	44	W
SDBB14	M	83	W
SDBB15	M	61	W
SDBB16	M	29	N/A
SDBB17	M	72	W
SDBB18	M	57	N/A
SDBB19	M	76	W
SDBB20	F	54	W
SDBB21	M	50	W
SDBB22	M	56	H
SDBB23	M	29	W
SDBB24	F	66	W
SDBB25	M	75	W
SDBB26	M	59	W
SDBB27	M	40	W
SDBB28	M	72	W
SDBB29	F	23	W
SDBB30	M	62	W
SDBB31	M	62	W
SDBB32	M	56	W
SDBB33	F	53	A
SDBB34	M	71	A
SDBB35	M	78	W
SDBB36	M	70	W
SDBB37	M	62	W
SDBB38	M	71	W
SDBB39	F	34	W
SDBB40	F	74	W
SDBB41	M	50	H
SDBB42	F	44	W
SDBB43	M	47	W
SDBB44	M	78	W
SDBB45	M	64	N/A
SDBB46	F	67	W
SDBB47	F	28	W
SDBB48	M	58	W
SDBB49	F	30	X
SDBB50	F	67	W
